# Supplementary material for: Eco-friendly multi-layered nanoswabs for sensitive removal of antibiotic-resistant bacteria from drinking water sources and their molecular biology studies
Source: Royal Society of Chemistry journal article supplement (doi:10.1039/d2en00814a), 2022-12-21
Supplement: d2en00814a3.pdf [file d2en00814a3.pdf]

### S.4.1 ROS and Live/Dead assay test

#### *Experimental*

The production of oxidative stress by bacteria after treatment with (sub-MIC) FATCNS and (3000  $\mu\text{g ml}^{-1}$ )  $\text{Fe}_3\text{O}_4$  NPs was evaluated using, 2'-7'-Dichlorofluorescein (DCF) (Sigma-Aldrich). DCF is a peroxynitrite indicator which can detect ROS.<sup>1</sup> The bacteria were incubated with NSs and NPs in presence of DCFH-DA at a final concentration of 5  $\mu\text{M}$  in Tris and incubated at 37 °C for 30 min and compared with control. The ROS activity was measured using fluorescence intensities of DCF emission at  $\lambda_{\text{ex}}$  504 nm;  $\lambda_{\text{em}}$  529 nm. Subsequently, after 15 min and 30 min of incubation of bacteria with (sub-MIC) FATCNS and (3000  $\mu\text{g ml}^{-1}$ )  $\text{Fe}_3\text{O}_4$  NPs, 100  $\mu\text{L}$  of the bacterial-NAs suspension was transferred into a 96-well plate. A Live/Dead assay was performed to determine the rapidity of the effect of NSs in bacteria, and the procedure was followed according to the manufacturer's instructions (Live/Dead, L7007; Invitrogen). Briefly, two solutions with a specific SYTO 9 dye and propidium iodide (PI) were added to a bacterial solution in 100  $\mu\text{L}$  per well. The plate was incubated in the dark for 15 min at room temperature, as per the manufacturer's instructions. Fluorescence intensities for live cells (excitation: 485 nm, emission: 530 nm) and dead cells (excitation: 485 nm, emission: 630 nm) were measured using a micro-plate reader. The ratio of Live/Dead bacteria after the treatment of FATCNS was determined using fluorescence intensities.

#### **Results**

It is known that higher the concentration of NAs in bacterial suspension and increase in contact time between bacteria and NAs influence the bactericidal and removal efficiency. The bactericidal effect of FATCNS in bacteria is due to increase in the cellular levels of ROS causing cell death. It is known that the DCF readily crosses the cell membrane along with the NAs through passive diffusion followed by deacetylation. This deacylated product is further oxidized to form fluorescent DCF, which is measured.<sup>1</sup> After 30 min of NAs and bacteria incubation, the ROS assay results (Figure S 4.1.A) confirm that the ROS production in *bacteria* is enhanced and higher when treated with FATCNS compared to control and NPs. This suggests that the ROS production has an indirect effect on the growth of *bacteria* and one of the caused cellular death. Further, the higher fluorescent intensity is observed in *S.aureus* compared to other two bacteria suggesting that the interaction of NSs with *S.aureus* is rapid and strong which was confirmed by Live/Dead assay results.

After 30 min of NAs and bacteria incubation, the Live/Dead assay results (Figure S 4.1. B) confirm that the ratio of Live/Dead bacteria is significantly lower compared to control even when the sub-MIC of FATCNS (sub MIC for *E.coli*- 50  $\mu\text{g}$  ( $10\text{ ml}^{-1}$ ), wtKARBJ1- 110  $\mu\text{g}$  ( $10\text{ ml}^{-1}$ ) and *S.aureus* 30  $\mu\text{g}$  ( $10\text{ ml}^{-1}$ )) is used in the assay. On the other hand, there is hardly any effect of NPs ( $3000\text{ }\mu\text{g ml}^{-1}$ ) on the Live/Dead ratio of bacteria after 30 min of incubation time. However, for *S.aureus*, the ratio drastically decreased after 15 min of incubation time compared to other two bacteria, that is, interaction time required for NSs to inactivate *S.aureus* is less than other two bacteria as seen in Figure S 4.1.C. This may indicate that FATCNS may be selective towards *S.aureus*, Gram-positive bacteria. Overall, the results suggest that the FATCNS reacts with the intracellular oxygen in bacteria, leading to oxidative stress and cell membrane disruption. Moreover, FATCNS is expeditious in inactivating *S.aureus*, Gram-positive bacteria even at sub-MIC.

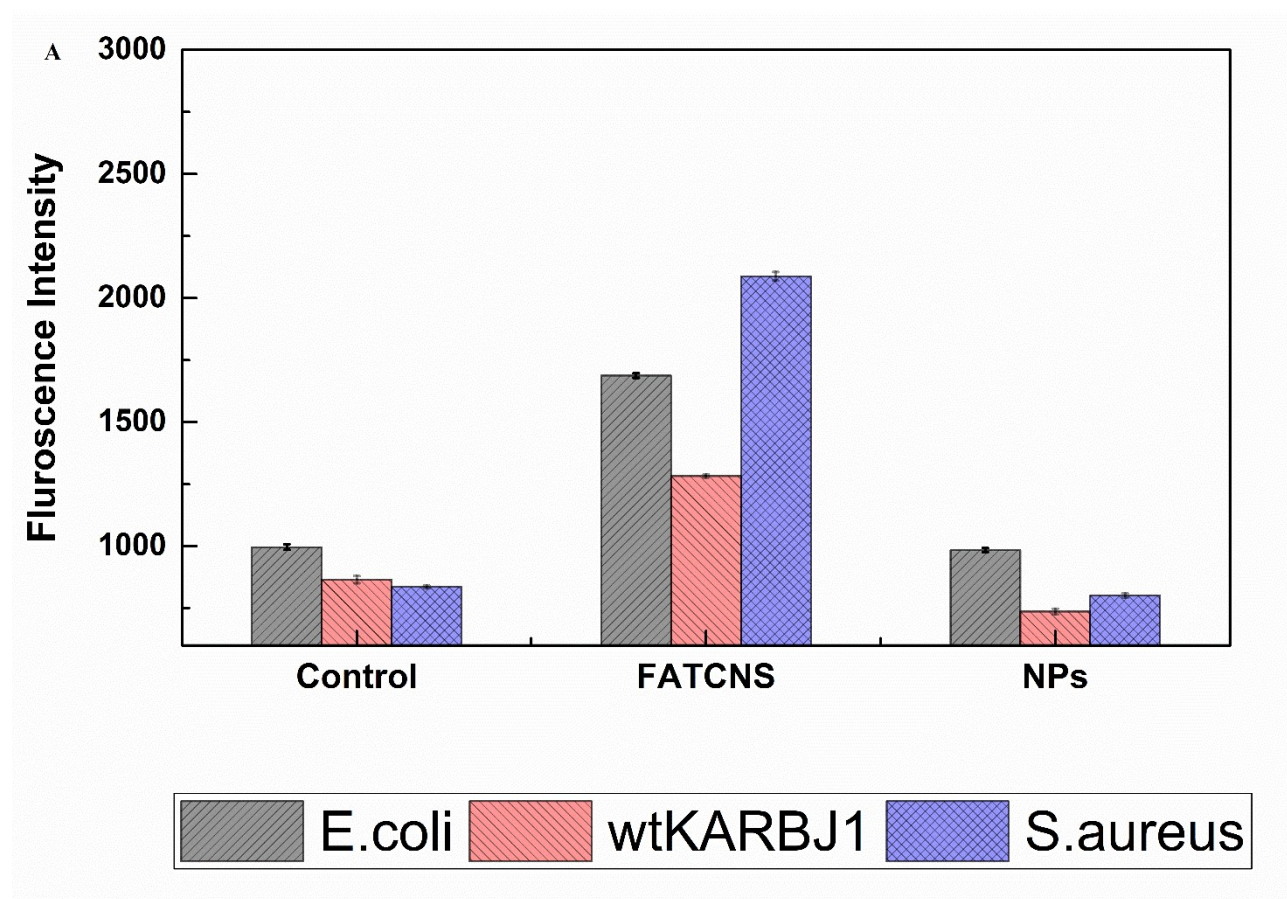

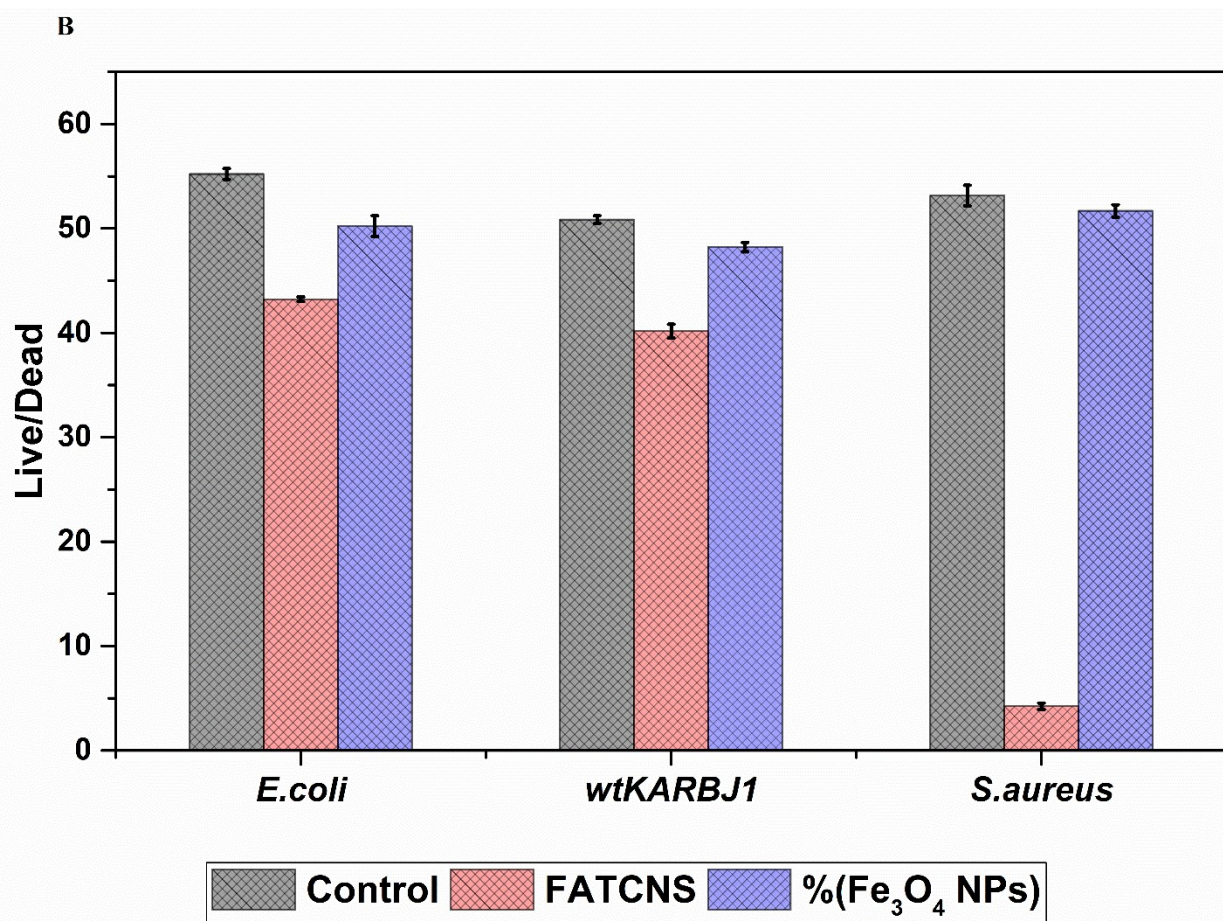



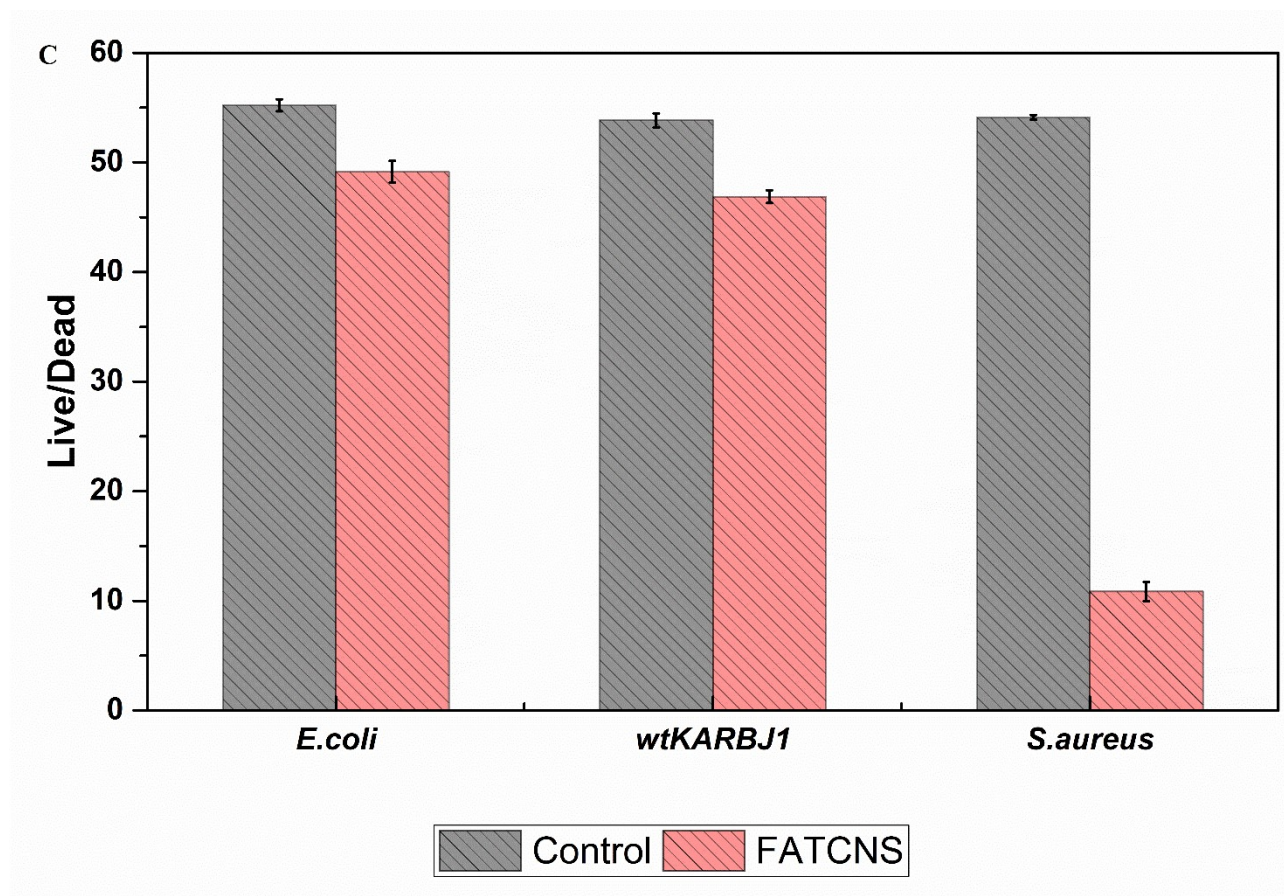

**Figure S 4.1.** (A) Quantitation of intracellular ROS production bacteria with FATCNS and  $\text{Fe}_3\text{O}_4$  NPs after 30 min treatment. Results are mean fluorescence intensity  $\pm$  SD ( $n = 3$ ). Live/Dead assay results show lower Live/Dead ratios in the presence of (B) the sub-MIC of FATCNS and  $\text{Fe}_3\text{O}_4$  NPs ( $3000 \mu\text{g ml}^{-1}$ ) solution after 30 min incubation and (C) the sub-MIC of FATCNS after 15 min incubation with SYTO 9 dye and propidium iodide (PI). Data = mean  $\pm$  SD;  $n = 3$ . \* $P < 0.05$  compared with control sample.

## S 4.2. Reusability of FATCNS

### *Experimental*

The characterization of the NSs after performing the reusability tests of FATCNS for ten cycles.

### **Results**

The FATCNS show remarkable reusability even after ten cycles of bacterial inactivation experiments. The removal capacity of FATCNS was nearly 100% for the bacteria. SI-4 Figure 2 show the FESEM images and XRD graphs of NAs after the repeatable cycles. The FESEM image in SI- 4 Figure 2 A shows aggregation of the NPs while the XRD measurements show

denaturation of the peaks after the 2<sup>nd</sup> use. However, SI- 4 Figure 2 B depicts no change in the FESEM image and the XRD spectrum of the NSs recovered after the 10<sup>th</sup> cycle.

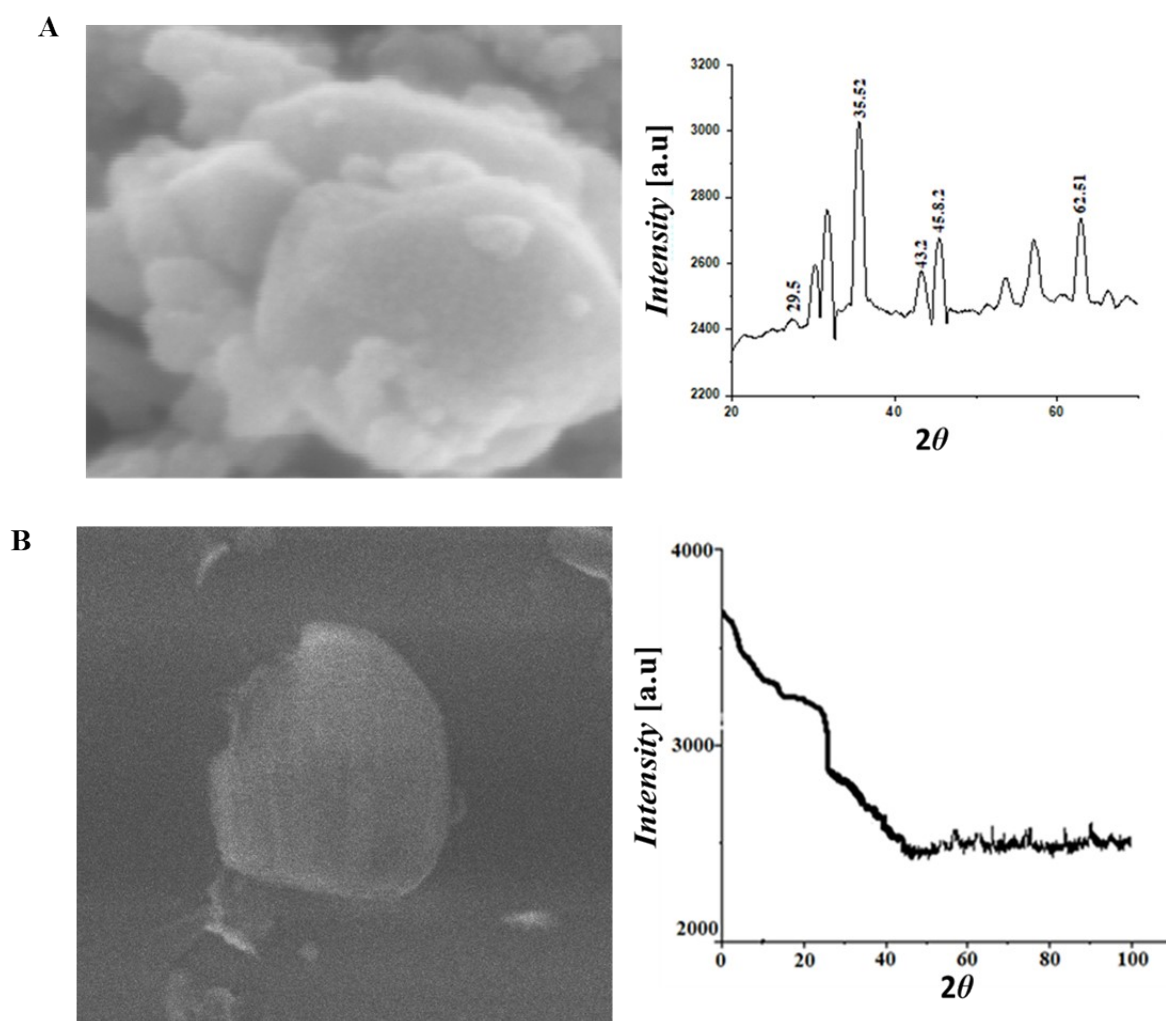

**Figure. S 4. 2.** (A) FESEM image and XRD spectrum of Fe<sub>3</sub>O<sub>4</sub> NPs after the 2<sup>nd</sup> reusability cycle. (B) FESEM image and XRD spectrum of FATCNS after the 10<sup>th</sup> cycle of the reusability test against *S.aureus*.

**Table S 4. 1.** Reusability of FATCNSs and Fe<sub>3</sub>O<sub>4</sub> NPs at different cycles.

| Removal Efficiency (%)   | 4 <sup>th</sup><br>cycle | 6 <sup>th</sup><br>cycle | 10 <sup>th</sup><br>cycle |
|--------------------------|--------------------------|--------------------------|---------------------------|
| River water + NSs        | 98                       | 96                       | 96                        |
| Kitchen wastewater + NSs | 94                       | 93                       | 93                        |
| Tap water + NSs          | 95                       | 93                       | 90                        |
| River water + NPs        | 26                       | 25                       | 25                        |
| Kitchen wastewater + NPs | 35                       | 32                       | 29                        |
| Tap water + NPs          | 30                       | 29                       | 28                        |

## References

- (1) Miura, M.; Murai, N.; Hattori, T.; Nagano, T.; Stuyvers, B. D.; Shindoh, C. Role of Reactive Oxygen Species and  $\text{Ca}^{2+}$  Dissociation from the Myofilaments in Determination of  $\text{Ca}^{2+}$  Wave Propagation in Rat Cardiac Muscle. *J Mol Cell Cardiol* 2013, **56** (1), 97–105.
